# Supplementary material for: Charged polymeric additives affect the nucleation of lysozyme crystals
Source: Royal Society of Chemistry journal article supplement (doi:10.1039/c8ce02169d), 2019-01-01
Supplement: c8ce02169d1.pdf [file c8ce02169d1.pdf]

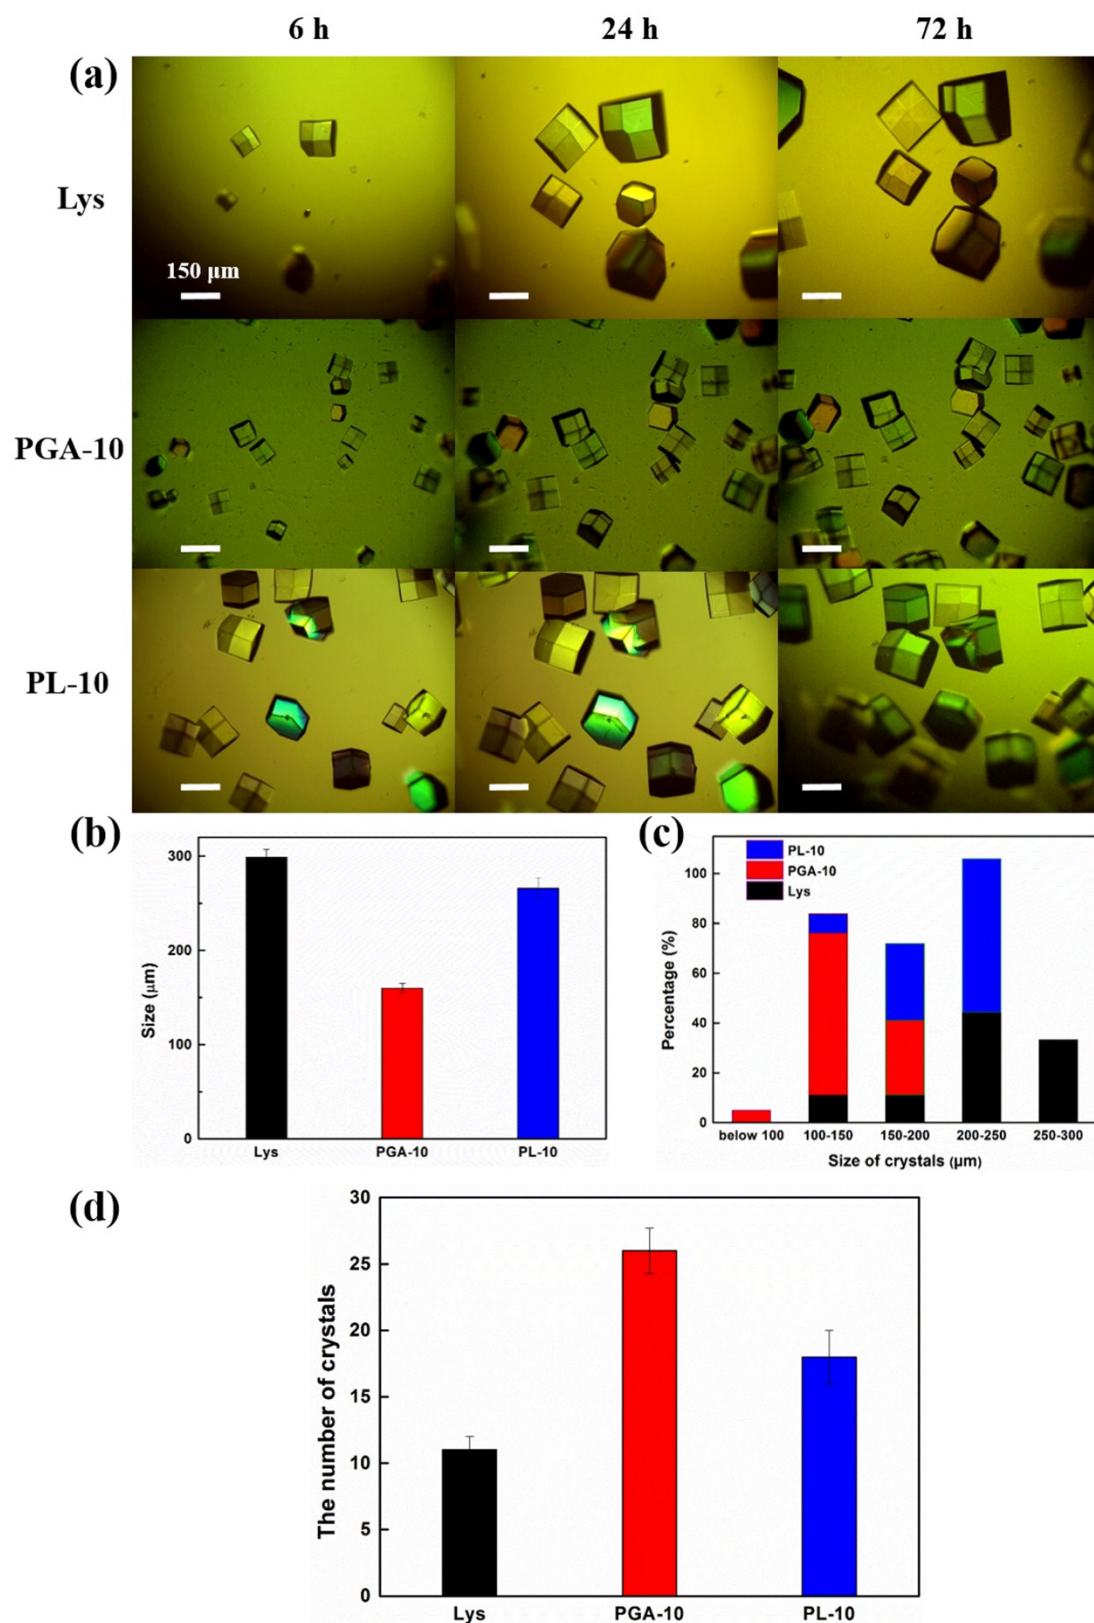

Fig. S1 (a) Photographs of lysozyme crystals grown at 10 °C for 6 h, 24 h, 72 h under the conditions of 15 mg/mL lysozyme and 0.6 M NaCl; together with the largest

length of lysozyme crystals (b), the size distribution of lysozyme crystals (c) and the number of lysozyme crystals (d) for 72h. Scale bar is 150  $\mu\text{m}$ .

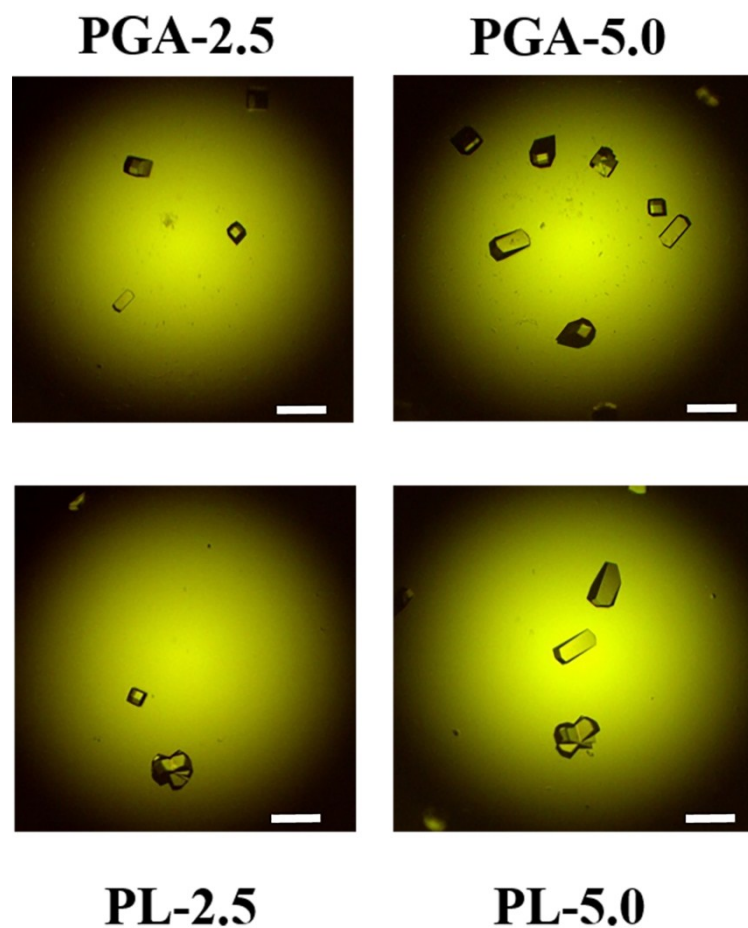

Fig. S2 Photographs of lysozyme crystals grown at 10  $^{\circ}\text{C}$  for 72 h in the presence of the additive (PGA-2.5, PGA-5.0, PL-2.5 and PL-5.0), under the conditions of 5 mg/mL lysozyme and 0.6 M NaCl. Scale bar is 150  $\mu\text{m}$ .

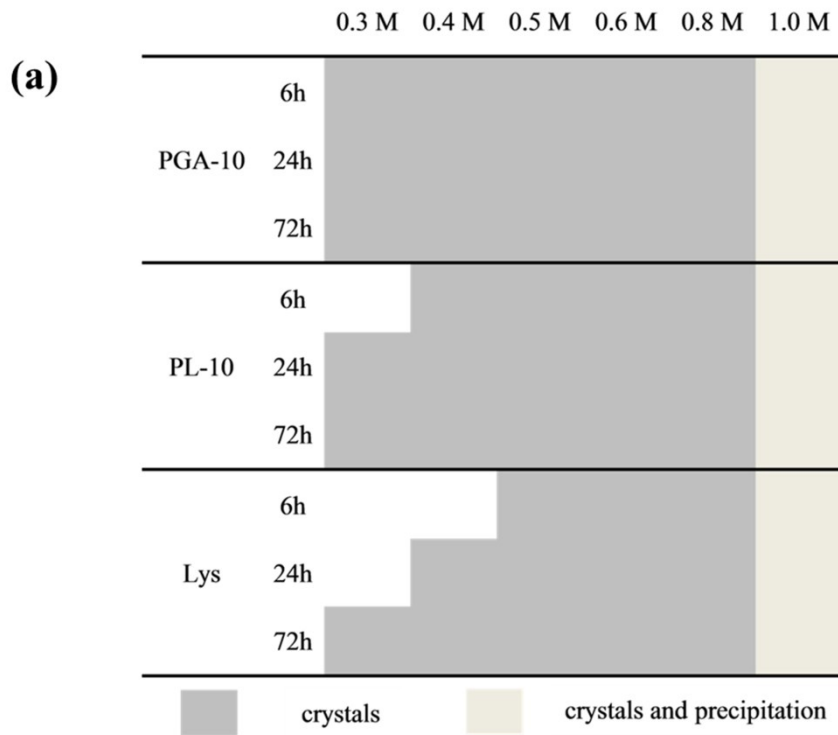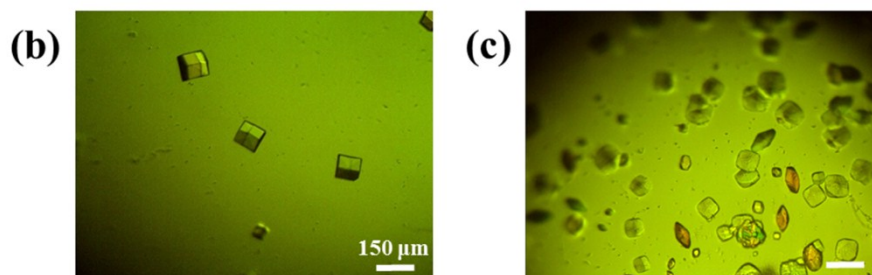

Fig. S3 (a) Results of lysozyme crystals (15 mg/mL) grown at 10 °C for 6 h, 24 h, 72 h with the different concentrations of NaCl in the absence of additives and in the presence of the additive with 10 mg/mL PGA and 10 mg/mL PL. (b) Photographs of lysozyme crystals grown in the presence of 10 mg/mL PL and 0.4 mg/mL NaCl at 10 °C for 6 h, and those grown in the presence of 10 mg/mL PGA and 0.3 mg/mL NaCl (c). Scale bar is 150 μm.

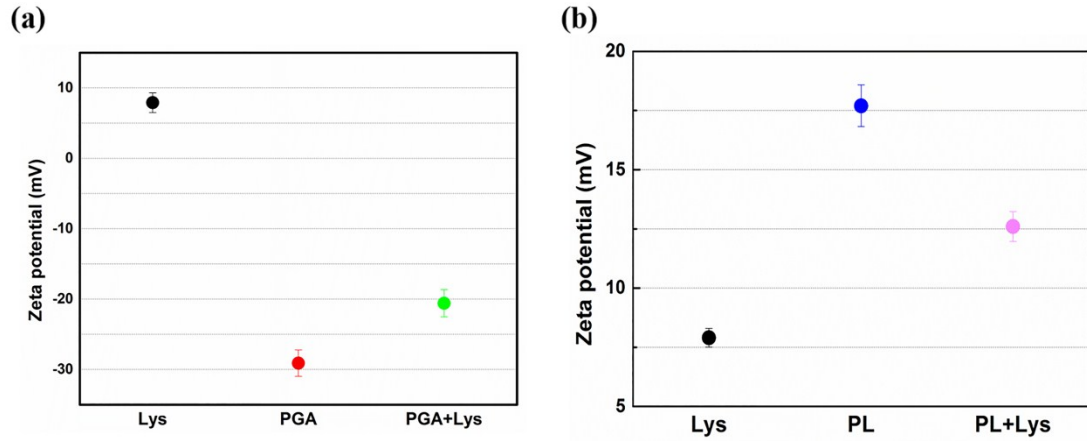

Fig. S4 Zeta potential results measured in solutions of 15 mg/mL protein, of 10 mg/mL PGA or 10 mg/mL PL and the mixture of the protein and the addition of PGA (a) or PL (b).

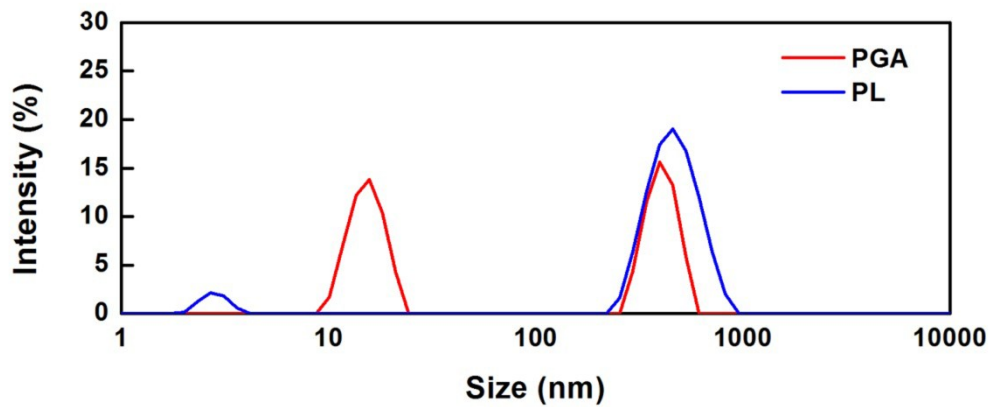

Fig. S5 Particle size measurement results in 10 mg/mL PGA and 10 mg/mL PL containing 0.1 M sodium acetate buffer and 0.6 M NaCl.

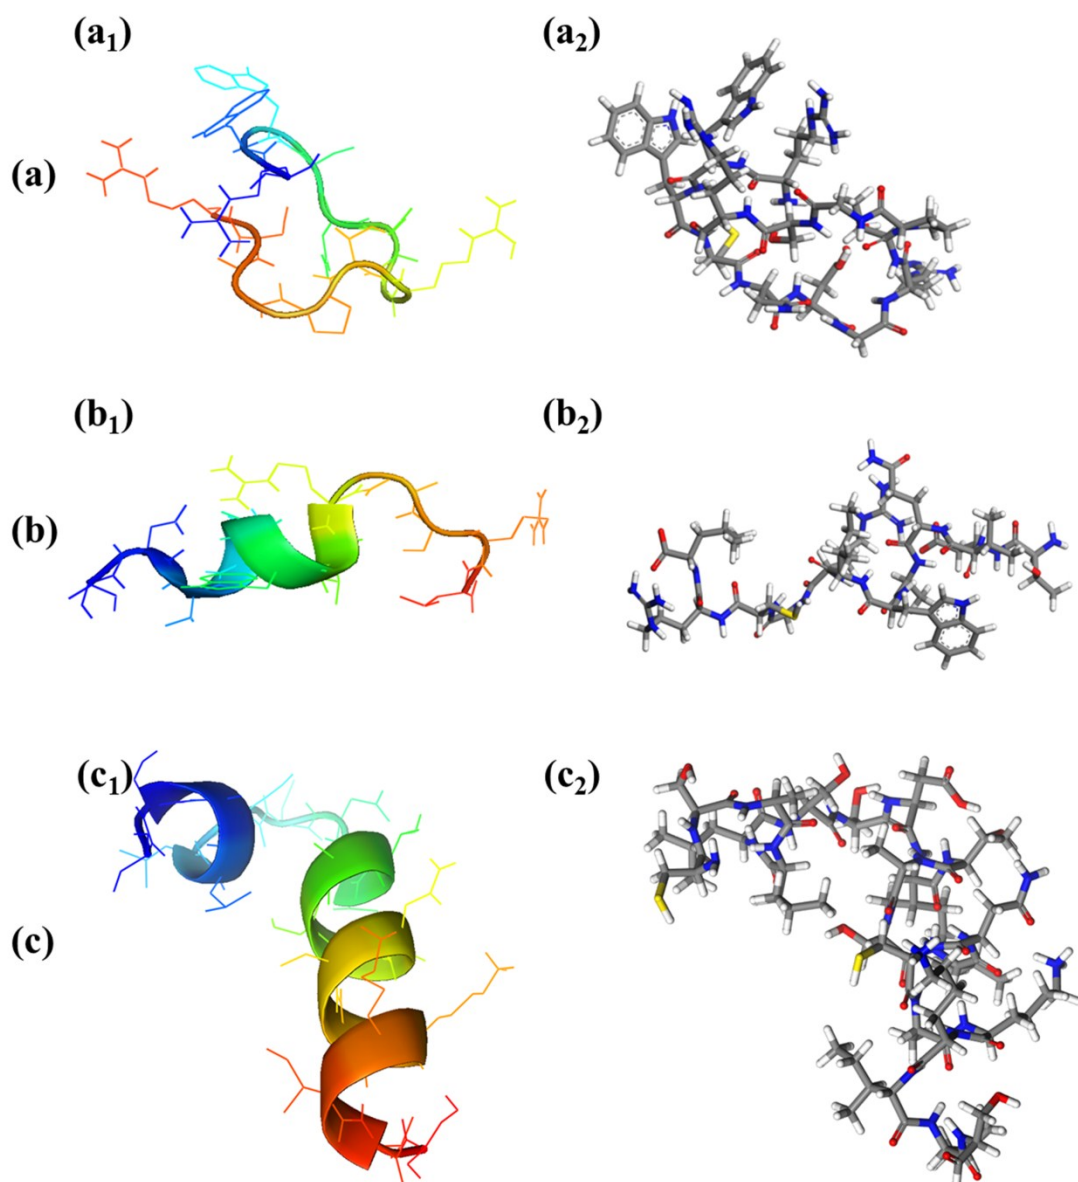

Fig. S6 The cartoon model of lysozyme segments with the random coil SEG1 (a<sub>1</sub>), the helix-like structure SEG2 (b<sub>1</sub>) and  $\alpha$ -helical structure SEG3 (c<sub>1</sub>), together with the corresponding stick model of the optimized structures after calculation using COMPASS force fields (a<sub>2</sub>, b<sub>2</sub> and c<sub>2</sub>).

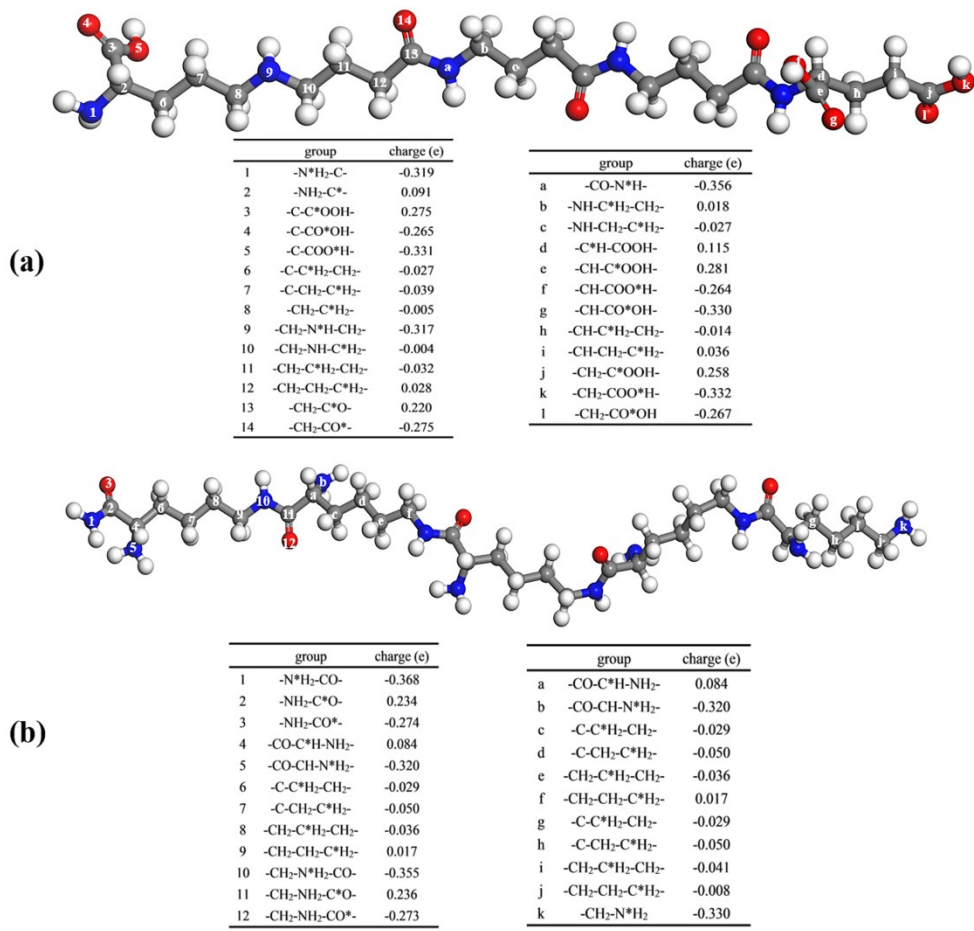

Fig. S7 Structures of the optimized models of PGA (a) and PL (b) and their charging characteristics.



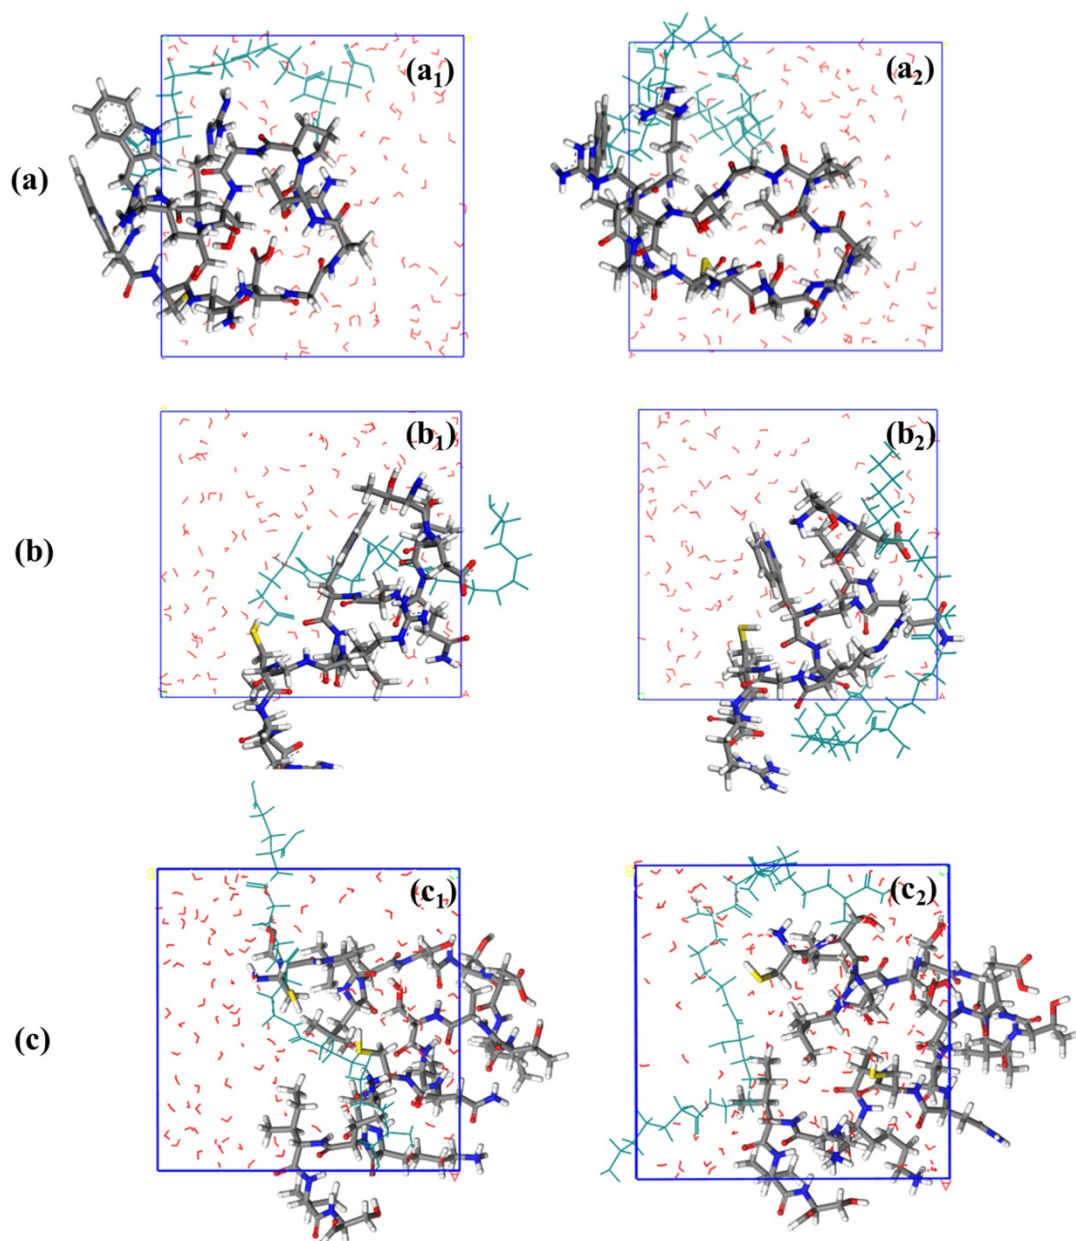

Fig. S8 Snapshot of three lysozyme segments with the random coil structure

(a:SEG1), the helix structure (b:SEG2) and the  $\alpha$ -helical structure (c:SEG3) interacted with PGA (with the subscript of 1) and PL (with the subscript of 2).
